# Supplementary material for: Quantitative prediction and clinical evaluation of an unexplored herb–drug interaction mechanism in healthy volunteers
Source: PubMed Central journal article supplement — CPT Pharmacometrics Syst Pharmacol. 2015 Nov 28;4(12):701–10. doi: 10.1002/psp4.12047 (PMC4759704; doi:10.1002/psp4.12047), 2015-11-28
Supplement: PSP4-4-701-s001.pdf [file PSP4-4-701-s001.pdf]

**Simcyp Population Based Simulator**  
 5/9/2015 6:56  
 Simcyp Version 13 Release 2 (04/04/2014)

| Substrate                                          |                  | Inhibitor 1                                        |                   | Inhibitor 2                                        |                   | Trial Design                                       |                                      | Software Version Detail      |                                                    |
|----------------------------------------------------|------------------|----------------------------------------------------|-------------------|----------------------------------------------------|-------------------|----------------------------------------------------|--------------------------------------|------------------------------|----------------------------------------------------|
| Compound Name                                      | Raltegravir ADAM | Compound Name                                      | Silybin A         | Compound Name                                      | Silybin B         | Use Pop Representative                             | No                                   | Simulation Duration(seconds) | 28,000                                             |
| Version number                                     | Not applicable   | Version number                                     | Not applicable    | Version number                                     | Not applicable    | Population Size                                    | 16,000                               | Windows Version              | Version 5.1 (Build 2600; Service Pack 3)           |
| Route                                              | Oral             | Route                                              | Oral              | Route                                              | Oral              | Number of Trials                                   | 1,000                                | Source File Location         | C:\Program Files (x86)\simcyp\Simcyp Simulator V13 |
| Sub : Dose Units                                   | Dose (mg)        | Inh 1 : Dose Units                                 | Dose (mg)         | Inh 2 : Dose Units                                 | Dose (mg)         | No of Subjects per Trial                           | 16,000                               | Data Path Location           | C:\Users\Public\Documents                          |
| Sub : Dose                                         | 60.000           | Inh 1 : Dose                                       | 240.000           | Inh 2 : Dose                                       | 320.000           | Population name                                    | Sim-Healthy Volunteers               | Excel Embedded Workspace     | Yes                                                |
| Start Day                                          | 1.000            | Start Day                                          | 1.000             | Start Day                                          | 1.000             | Version number                                     | 13.1.1                               | Simcyp.exe                   |                                                    |
| Start Time                                         | 08:00            | Start Time                                         | 08:00             | Start Time                                         | 08:00             | Minimum Age (years)                                | 19,000                               | BayesianPluginV13.dll        | 13.3.89.6                                          |
| Dosing Regimen                                     | Single Dose      | Dosing Regimen                                     | Multiple Dose     | Dosing Regimen                                     | Multiple Dose     | Propn. of Females                                  | 0.500                                | Date Modified                | 04/04/2014                                         |
| Compound Type                                      | Small Molecule   | Dose Interval (h)                                  | 8.000             | Dose Interval (h)                                  | 8.000             | Fluid Intake with dose (mL)                        | 250.000                              | File Size (bytes)            | 829,328                                            |
| PhysChem and Blood Binding                         |                  | Number of Doses                                    | 12,000            | Number of Doses                                    | 12,000            | Fluid Intake with dose CV (%)                      | 30.000                               | File Size (bytes)            | 240,42914                                          |
| Mo Weight (g/mol)                                  | 510.050          | PhysChem and Blood Binding                         |                   | PhysChem and Blood Binding                         |                   | PKPD Profiles                                      | On                                   | Date Modified                | 03/04/2014                                         |
| log P                                              | 6.860            | Mo Weight (g/mol)                                  | 482.440           | Mo Weight (g/mol)                                  | 482.440           | Start Day/Time                                     | Day 1, 09:00                         | File Version                 | 1.0.2                                              |
| Compound Type                                      | Monoprotic Base  | log P                                              | 6.860             | log P                                              | 6.860             | End Day/Time                                       | Day 5, 09:00                         | Date Modified                | 04/04/2014                                         |
| pk1                                                | log P            | Compound Type                                      | Diprotic Acid     | Compound Type                                      | Diprotic Acid     | Study Duration (h)                                 | 96,000                               | File Size (bytes)            | 783,336                                            |
| BP Input                                           | User Input       | pk1                                                | 6.870             | pk1                                                | 6.870             | CompoundImportBackendV13.dll                       |                                      | File Version                 | 11.1.8.0.0                                         |
| BP                                                 | 1.000            | pk2                                                | 6.900             | pk2                                                | 6.900             | Inh 1 : Route                                      | Oral                                 | Date Modified                | 04/04/2014                                         |
| Haematocrit                                        | 45.000           | BP Input                                           | User Input        | BP Input                                           | User Input        | Sub : Dose Units                                   | Dose (mg)                            | File Size (bytes)            | 239,104                                            |
| Iu Input                                           | User             | BP                                                 | 1.000             | BP                                                 | 1.000             | Sub : Dose                                         | 60.000                               | File Version                 | 13.3.89.6                                          |
| Iu                                                 | 0.850            | Haematocrit                                        | 45.000            | Haematocrit                                        | 45.000            | Inh 1 : Route                                      | Oral                                 | Date Modified                | 04/04/2014                                         |
| Reference Binding Component                        |                  | Iu Input                                           | User              | Iu Input                                           | User              | Inh 1 : Dose Units                                 | Dose (mg)                            | File Size (bytes)            | 240,42914                                          |
| Protein Reference Conc (g/L)                       | 45.000           | BP                                                 | 1.000             | BP                                                 | 1.000             | Inh 2 : Dose                                       | 320.000                              | File Version                 | 13.3.89.6                                          |
| % Bound to Lipoprotein                             | 0.000            | Reference Binding Component                        |                   | Reference Binding Component                        |                   | Inh 2 : Route                                      | Oral                                 | Date Modified                | 04/04/2014                                         |
| % Bound to Lipoprotein (CV %)                      | 0.000            | Protein Reference Conc (g/L)                       | 45.000            | Protein Reference Conc (g/L)                       | 45.000            | Inh 2 : Dose Units                                 | Dose (mg)                            | File Size (bytes)            | 240,42914                                          |
| Absorption                                         |                  | % Bound to Lipoprotein                             | 0.000             | % Bound to Lipoprotein                             | 0.000             | Inh 2 : Dose                                       | 320.000                              | File Version                 | 13.3.89.6                                          |
| Absorption Model                                   | ADAM             | % Bound to Lipoprotein (CV %)                      | 0.000             | % Bound to Lipoprotein (CV %)                      | 0.000             | Random Generator                                   | Simcyp Linear Congruential Generator | File Size (bytes)            | 243,976                                            |
| Input Type                                         | Predicted        | Absorption                                         |                   | Absorption                                         |                   | Seed                                               | Fixed                                | File Version                 | 1.0.2                                              |
| Iu (Gut)                                           | 0.850            | Input Type                                         | Predicted         | Input Type                                         | Predicted         | Seed Value                                         | 1.000                                | Date Modified                | 04/04/2014                                         |
| PerfMan Type                                       | Regional         | PerfMan Type                                       | Regional          | PerfMan Type                                       | Regional          | Output sampling interval (h)                       | 0.050                                | File Size (bytes)            | 499,776                                            |
| Permeability Assay                                 | Papp             | Activity                                           | Passive           | Activity                                           | Passive           | Memory Size                                        | 11,404,747,000                       | File Version                 | 13.3.89.6                                          |
| Value                                              | 0.000            | Value                                              | 0.000             | Value                                              | 0.000             | Number of time samples                             | 200,000                              | Date Modified                | 04/04/2014                                         |
| Slope                                              | 0.752            | Slope                                              | 0.752             | Slope                                              | 0.752             | Differential Solver                                | 9th-order Runge-Kutta                | File Size (bytes)            | 167,936                                            |
| Intercept                                          | 0.544            | Intercept                                          | 0.544             | Intercept                                          | 0.544             | Maximum number of steps                            | 10,000,000                           | File Version                 | 13.3.89.6                                          |
| Degradation Rate Stomach (1/h)                     | 0.000            | Degradation Rate Duodenum (1/h)                    | 0.000             | Degradation Rate Jejunum I (1/h)                   | 0.000             | Relative Tolerance                                 | 0.000                                | Date Modified                | 04/04/2014                                         |
| Degradation Rate Jejunum II (1/h)                  | 0.000            | Degradation Rate Ileum I (1/h)                     | 0.000             | Degradation Rate Ileum II (1/h)                    | 0.000             | Integration error tolerance                        | 0.000                                | File Size (bytes)            | 112,64                                             |
| Degradation Rate Ileum III (1/h)                   | 0.000            | Degradation Rate Ileum IV (1/h)                    | 0.000             | Degradation Rate Colon (1/h)                       | 0.000             | Paediatric Module                                  | Not Loaded                           | Login name                   | BRANDON.PC                                         |
| Degradation Rate Colon (1/h)                       | 0.000            | Input Form                                         | Solid Formulation | Input Form                                         | Solid Formulation | No. Differential Equations                         | 980,000                              | Computer name                | BRANDON.PC                                         |
| Formulation                                        |                  | Formulation                                        |                   | Formulation                                        |                   | Immediate Release (IR)                             |                                      | License type                 | Desktop                                            |
| Solubility                                         | Intrinsic        | Solubility                                         | Intrinsic         | Solubility                                         | Intrinsic         | Distribution Model                                 | Full PBPK Model                      | Key                          | AALJJKRANJJCBOAI                                   |
| Solubility at Type                                 | Intrinsic        | Solubility at Type                                 | Intrinsic         | Solubility at Type                                 | Intrinsic         | Replacement Organ7                                 | No                                   | Expiry                       | 10/2015                                            |
| Placination Rate Const. (1/h)                      | 4.000            | Placination Rate Const. (1/h)                      | 4.000             | Placination Rate Const. (1/h)                      | 4.000             | Organ Replaced                                     | ina                                  | Key                          | AALJJKRANJJCBOAI                                   |
| Maximum Supersaturation Ratio                      | 10.000           | Maximum Supersaturation Ratio                      | 10.000            | Maximum Supersaturation Ratio                      | 10.000            | User-defined Additional Organ                      | ina                                  | Expiry                       | 10/2015                                            |
| Solubility Factor 1                                | 1000.000         | Solubility Factor 1                                | 1000.000          | Solubility Factor 1                                | 1000.000          | Dispersion Type                                    | Monodispersed                        |                              |                                                    |
| Dispersion Type                                    | Monodispersed    | Dispersion Type                                    | Monodispersed     | Dispersion Type                                    | Monodispersed     | Radii (µm)                                         | 10.000                               |                              |                                                    |
| Radii (µm)                                         | 10.000           | Radii (µm)                                         | 10.000            | Radii (µm)                                         | 10.000            | Particle density (g/mL)                            | 1.200                                |                              |                                                    |
| Particle density (g/mL)                            | 1.200            | Particle density (g/mL)                            | 1.200             | Particle density (g/mL)                            | 1.200             | Diffusion coeff. type                              | Predicted                            |                              |                                                    |
| Diffusion coeff. type                              | Predicted        | Diffusion coeff. type                              | Predicted         | Diffusion coeff. type                              | Predicted         | Diffusion coeff. ionised (10-4 cm2/min)            | 3.885                                |                              |                                                    |
| Diffusion coeff. ionised (10-4 cm2/min)            | 3.885            | Diffusion coeff. ionised (10-4 cm2/min)            | 3.885             | Diffusion coeff. ionised (10-4 cm2/min)            | 3.885             | Diffusion coeff. micelle (15-4 cm2/min) mean       | 0.790                                |                              |                                                    |
| Diffusion coeff. micelle (15-4 cm2/min) mean       | 0.790            | Diffusion coeff. micelle (15-4 cm2/min) mean       | 0.790             | Diffusion coeff. micelle (15-4 cm2/min) mean       | 0.790             | Diffusion coeff. micelle CV (%)                    | 20.000                               |                              |                                                    |
| Diffusion coeff. micelle CV (%)                    | 20.000           | Diffusion coeff. micelle CV (%)                    | 20.000            | Diffusion coeff. micelle CV (%)                    | 20.000            | Diffusion coeff. (1.9E-4 cm2/min)                  | 3.885                                |                              |                                                    |
| Diffusion coeff. (1.9E-4 cm2/min)                  | 3.885            | Diffusion coeff. (1.9E-4 cm2/min)                  | 3.885             | Diffusion coeff. (1.9E-4 cm2/min)                  | 3.885             | Effective diffusion layer thickness (µm)           | 10.000                               |                              |                                                    |
| Effective diffusion layer thickness (µm)           | 10.000           | Effective diffusion layer thickness (µm)           | 10.000            | Effective diffusion layer thickness (µm)           | 10.000            | Bile Micelle mediated solubilisation               | On                                   |                              |                                                    |
| Bile Micelle mediated solubilisation               | On               | Bile Micelle mediated solubilisation               | On                | Bile Micelle mediated solubilisation               | On                | Bile solubilisation type                           | Predicted                            |                              |                                                    |
| Bile solubilisation type                           | Predicted        | Bile solubilisation type                           | Predicted         | Bile solubilisation type                           | Predicted         | Bile Micelle Partition: Slope                      | 0.740                                |                              |                                                    |
| Bile Micelle Partition: Slope                      | 0.740            | Bile Micelle Partition: Slope                      | 0.740             | Bile Micelle Partition: Slope                      | 0.740             | Bile Micelle Partition: Offset                     | 2.290                                |                              |                                                    |
| Bile Micelle Partition: Offset                     | 2.290            | Bile Micelle Partition: Offset                     | 2.290             | Bile Micelle Partition: Offset                     | 2.290             | Bile Micelle Partition: Ionised Species Correction | 1.000                                |                              |                                                    |
| Bile Micelle Partition: Ionised Species Correction | 1.000            | Bile Micelle Partition: Ionised Species Correction | 1.000             | Bile Micelle Partition: Ionised Species Correction | 1.000             | Distribution                                       |                                      |                              |                                                    |
| Distribution                                       |                  | Distribution                                       |                   | Distribution                                       |                   | Distribution Model                                 | Full PBPK Model                      |                              |                                                    |
| Distribution Model                                 | Full PBPK Model  | Distribution Model                                 | Full PBPK Model   | Distribution Model                                 | Full PBPK Model   | Replacement Organ7                                 | No                                   |                              |                                                    |
| Replacement Organ7                                 | No               | Replacement Organ7                                 | No                | Replacement Organ7                                 | No                | Organ Replaced                                     | ina                                  |                              |                                                    |
| Organ Replaced                                     | ina              | Organ Replaced                                     | ina               | Organ Replaced                                     | ina               | User-defined Additional Organ                      | ina                                  |                              |                                                    |
| User-defined Additional Organ                      | ina              | User-defined Additional Organ                      | ina               | User-defined Additional Organ                      | ina               | Type                                               | ina                                  |                              |                                                    |
| Type                                               | ina              | Type                                               | ina               | Type                                               | ina               | Vas mode                                           | Predicted                            |                              |                                                    |
| Vas mode                                           | Predicted        | Vas mode                                           | Predicted         | Vas mode                                           | Predicted         | Prediction Method                                  | Method 2                             |                              |                                                    |
| Prediction Method                                  | Method 2         | Prediction Method                                  | Method 2          | Prediction Method                                  | Method 2          | Concentration-dependent volume                     | No                                   |                              |                                                    |
| Concentration-dependent volume                     | No               | Concentration-dependent volume                     | No                | Concentration-dependent volume                     | No                | log P <sub>ow</sub>                                | 6.860                                |                              |                                                    |
| log P <sub>ow</sub>                                | 6.860            | log P <sub>ow</sub>                                | 6.860             | log P <sub>ow</sub>                                | 6.860             | logP <sub>vw</sub> value                           | 6.290                                |                              |                                                    |
| logP <sub>vw</sub> value                           | 6.290            | logP <sub>vw</sub> value                           | 6.290             | logP <sub>vw</sub> value                           | 6.290             | Compound Type                                      | Monoprotic Base                      |                              |                                                    |
| Compound Type                                      | Monoprotic Base  | Compound Type                                      | Monoprotic Base   | Compound Type                                      | Monoprotic Base   | pk1                                                | 6.860                                |                              |                                                    |
| pk1                                                | 6.860            | pk1                                                | 6.860             | pk1                                                | 6.860             | Haematocrit                                        | 45.000                               |                              |                                                    |
| Haematocrit                                        | 45.000           | Haematocrit                                        | 45.000            | Haematocrit                                        | 45.000            | Iu                                                 | 0.850                                |                              |                                                    |
| Iu                                                 | 0.850            | Iu                                                 | 0.850             | Iu                                                 | 0.850             | Adipose Input Type                                 | Predicted                            |                              |                                                    |
| Adipose Input Type                                 | Predicted        | Adipose Input Type                                 | Predicted         | Adipose Input Type                                 | Predicted         |                                                    |                                      |                              |                                                    |
